# Supplementary material for: Transport coefficients of isotopic mixtures of noble gases based on ab initio potentials
Source: Royal Society of Chemistry journal article supplement (doi:10.1039/d1cp01971f), 2021-01-01
Supplement: d1cp01971f1.xlsx [file d1cp01971f1.xlsx]

## Sheet: Visc. & Ther. cond.
µ -Viscosity
κ - thermal conductivity
T - Temperature
	Ne				Kr				Xe
	μ (μPa·s)		κ (mW/(m·K))		μ (μPa·s)		κ (mW/(m·K))		μ (μPa·s)		κ (mW/(m·K))
T (K)	single	mixture	single	mixture	single	mixture	single	mixture	single	mixture	single	mixture
20	3.15627	3.15625	4.87856	4.87896
25	3.9214	3.92143	6.05942	6.05994
30	4.7095	4.70955	7.27668	7.27725
35	5.50331	5.50338	8.50308	8.50367
40	6.29146	6.29154	9.72092	9.72149
45	7.06695	7.06704	10.9194	10.92
50	7.82574	7.82584	12.0925	12.093	4.95443	4.95444	1.84625	1.84627
55	8.56573	8.56584	13.2369	13.2373	5.34629	5.3463	1.99217	1.9922
60	9.28607	9.28619	14.3514	14.3518	5.73494	5.73494	2.1368	2.13684
65	9.98673	9.98684	15.4359	15.4363	6.12239	6.12239	2.28091	2.28096
70	10.6681	10.6682	16.4911	16.4914	6.51023	6.51024	2.4251	2.42515	6.22738	6.22644	1.48113	1.48093
75	11.331	11.3311	17.518	17.5183	6.89964	6.89965	2.56982	2.56988	6.57854	6.57747	1.5646	1.56437
80	11.9761	11.9763	18.518	18.5183	7.29143	7.29145	2.7154	2.71547	6.92714	6.92593	1.64742	1.64716
85	12.6046	12.6047	19.4925	19.4927	7.68614	7.68615	2.86204	2.86211	7.27418	7.27285	1.72983	1.72955
90	13.2173	13.2174	20.4428	20.443	8.08405	8.08407	3.00986	3.00994	7.62052	7.61908	1.81205	1.81175
95	13.8151	13.8152	21.3705	21.3706	8.48529	8.48531	3.15893	3.15902	7.96688	7.96534	1.89425	1.89392
100	14.399	14.3991	22.2767	22.2768	8.88984	8.88986	3.30924	3.30933	8.31385	8.31224	1.97656	1.97622
120	16.6116	16.6117	25.7128	25.7128	10.5379	10.538	3.92175	3.92186	9.71557	9.71385	2.30896	2.30861
140	18.6602	18.6604	28.8962	28.8962	12.2216	12.2217	4.5478	4.54791	11.148	11.1464	2.64861	2.6483
160	20.5792	20.5794	31.8789	31.8789	13.9232	13.9232	5.1807	5.18081	12.6118	12.6106	2.99578	2.99557
180	22.3936	22.3937	34.6991	34.6992	15.627	15.6271	5.81461	5.81471	14.1011	14.1003	3.34913	3.34902
200	24.1217	24.1219	37.3853	37.3854	17.3212	17.3213	6.44504	6.44513	15.608	15.6077	3.70675	3.70676
220	25.7775	25.7777	39.9588	39.9589	18.997	18.9971	7.06875	7.06884	17.1245	17.1247	4.06676	4.06688
240	27.3718	27.3719	42.4363	42.4364	20.6485	20.6485	7.68356	7.68363	18.6437	18.6444	4.42746	4.4277
260	28.9127	28.9129	44.8306	44.8308	22.2718	22.2719	8.28805	8.28811	20.1598	20.1609	4.78747	4.7878
273.15	29.9001	29.9003	46.3647	46.365	23.3226	23.3227	8.67945	8.67951	21.1525	21.1539	5.02323	5.02363
280	30.4071	30.4073	47.1522	47.1525	23.8647	23.8648	8.88138	8.88144	21.6678	21.6694	5.14564	5.14606
298.15	31.7274	31.7276	49.2031	49.2035	25.2829	25.283	9.40982	9.40987	23.0264	23.0283	5.46835	5.46885
300	31.8602	31.8604	49.4094	49.4098	25.426	25.4261	9.46314	9.46319	23.1643	23.1662	5.5011	5.5016
350	35.34	35.3402	54.8136	54.8141	29.1904	29.1905	10.8666	10.8666	26.8376	26.8403	6.3739	6.37457
400	38.6398	38.64	59.9366	59.9374	32.7641	32.7642	12.2001	12.2001	30.3956	30.3987	7.21972	7.22049
450	41.7943	41.7946	64.8331	64.8341	36.1631	36.1632	13.4693	13.4692	33.8287	33.8321	8.03631	8.03715
500	44.8284	44.8287	69.5415	69.5427	39.4057	39.4058	14.6808	14.6808	37.1369	37.1405	8.82369	8.82456
550	47.7601	47.7605	74.0904	74.0919	42.5097	42.5098	15.8412	15.8411	40.3255	40.3292	9.58301	9.5839
600	50.6035	50.604	78.5016	78.5033	45.491	45.4911	16.956	16.956	43.4017	43.4055	10.316	10.3169
650	53.3695	53.37	82.7922	82.7941	48.3636	48.3637	18.0305	18.0305	46.374	46.3778	11.0245	11.0254
700	56.0669	56.0675	86.976	86.9781	51.1395	51.1396	19.0691	19.069	49.2506	49.2543	11.7105	11.7114
750	58.7028	58.7034	91.064	91.0663	53.829	53.8291	20.0754	20.0754	52.0395	52.0431	12.3758	12.3766
800	61.2833	61.2839	95.0657	95.0682	56.4411	56.4412	21.0528	21.0528	54.7479	54.7514	13.0221	13.0229
850	63.8133	63.814	98.9888	98.9916	58.9834	58.9835	22.0042	22.0041	57.3826	57.386	13.6509	13.6517
900	66.2972	66.2979	102.84	102.843	61.4624	61.4625	22.9318	22.9318	59.9496	59.9529	14.2637	14.2645
950	68.7386	68.7394	106.625	106.629	63.8839	63.884	23.8379	23.8379	62.4544	62.4576	14.8617	14.8625
1000	71.1407	71.1415	110.35	110.353	66.2527	66.2529	24.7243	24.7243	64.9019	64.905	15.4461	15.4468
1200	80.408	80.409	124.716	124.72	75.2812	75.2814	28.102	28.102	74.1997	74.2025	17.6664	17.6671
1400	89.2228	89.224	138.378	138.383	83.7354	83.7356	31.2639	31.264	82.8606	82.863	19.7346	19.7352
1600	97.6749	97.6762	151.477	151.483	91.7471	91.7474	34.2594	34.2595	91.0294	91.0317	21.685	21.6855
1800	105.827	105.829	164.11	164.117	99.4046	99.4049	37.1217	37.1219	98.806	98.808	23.5413	23.5418
2000	113.725	113.727	176.348	176.356	106.77	106.771	39.8743	39.8745	106.261	106.263	25.3204	25.3209
2500	132.572	132.574	205.547	205.558	124.183	124.183	46.3792	46.3795	123.805	123.806	29.5057	29.5062
3000	150.409	150.412	233.179	233.191	140.504	140.505	52.474	52.4744	140.17	140.172	33.4082	33.4087
3500	167.465	167.468	259.597	259.612	156.006	156.006	58.2612	58.2617	155.662	155.664	37.1011	37.1016
4000	183.893	183.896	285.04	285.056	170.861	170.861	63.8057	63.8064	170.472	170.474	40.6304	40.631
4500	199.799	199.802	309.672	309.691	185.187	185.188	69.1522	69.153	184.729	184.73	44.0271	44.0277
5000	215.262	215.266	333.617	333.638	199.071	199.072	74.3326	74.3336	198.524	198.526	47.3133	47.314

## Sheet: Diff. Ne
Dij - Maxwell-Stefan diffusion coefficients of neon isotopes at the standard pressure p= 101325 Pa
D0 - self-diffusion coefficient of neon at the standard pressure p= 101325 Pa
T - Temperature
	D ×106 (m2/s)
T (K)	D12	D13	D23	D0
20	0.341012	0.337332	0.333212	0.343465
25	0.530555	0.524752	0.518261	0.534427
30	0.763281	0.754843	0.74541	0.768914
35	1.03764	1.02608	1.01317	1.04536
40	1.35177	1.33663	1.31972	1.36187
45	1.70376	1.68462	1.66323	1.71654
50	2.09181	2.06825	2.04193	2.10755
55	2.51426	2.48588	2.45418	2.53321
60	2.96959	2.93602	2.89851	2.99201
65	3.45644	3.41732	3.37359	3.48258
70	3.97361	3.92858	3.87824	4.00369
75	4.52002	4.46874	4.41141	4.55427
80	5.09469	5.03683	4.97214	5.13334
85	5.69675	5.632	5.55958	5.74002
90	6.32544	6.25347	6.17298	6.37352
95	6.98003	6.90055	6.81164	7.03314
100	7.65989	7.5726	7.47493	7.71822
120	10.6211	10.4997	10.3638	10.7022
140	13.9477	13.7879	13.609	14.0545
160	17.6173	17.4151	17.1886	17.7524
180	21.6126	21.3643	21.0859	21.7786
200	25.9198	25.6216	25.2872	26.1191
220	30.5274	30.1759	29.7816	30.7624
240	35.4258	35.0175	34.5596	35.6988
260	40.6066	40.1383	39.613	40.9197
273.15	44.1633	43.6539	43.0823	44.504
280	46.0625	45.5311	44.9348	46.4179
298.15	51.2465	50.6551	49.9914	51.642
300	51.7871	51.1894	50.5187	52.1868
350	67.2373	66.4608	65.5892	67.7567
400	84.2548	83.2815	82.1888	84.9059
450	102.777	101.59	100.257	103.572
500	122.753	121.335	119.743	123.702
550	144.138	142.473	140.603	145.253
600	166.894	164.966	162.801	168.184
650	190.988	188.781	186.304	192.463
700	216.388	213.889	211.083	218.06
750	243.069	240.262	237.111	244.947
800	271.006	267.877	264.364	273.099
850	300.177	296.712	292.822	302.495
900	330.562	326.747	322.463	333.114
950	362.142	357.963	353.271	364.937
1000	394.899	390.343	385.228	397.946
1200	537.398	531.202	524.248	541.541
1400	697.619	689.582	680.561	702.994
1600	874.862	864.79	853.486	881.599
1800	1068.56	1056.26	1042.46	1076.78
2000	1278.22	1263.52	1247.03	1288.05
2500	1869.67	1848.2	1824.1	1884.03
3000	2553.32	2524.02	2491.16	2572.91
3500	3325.26	3287.14	3244.38	3350.75
4000	4182.41	4134.5	4080.77	4214.44
4500	5122.24	5063.61	4997.85	5161.44
5000	6142.63	6072.36	5993.56	6189.61

## Sheet: Diff. Ar
Dij - Maxwell-Stefan diffusion coefficients of argon isotopes at the standard pressure p= 101325 Pa
D0 - self-diffusion coefficient of argon at the standard pressure p= 101325 Pa
T - Temperature
	D ×106 (m2/s)
T (K)	D12	D13	D23	D0
30	0.23507	0.232138	0.228836	0.225865
35	0.311715	0.307837	0.303471	0.299542
40	0.398914	0.393964	0.388392	0.383378
45	0.496927	0.490776	0.483854	0.477623
50	0.606007	0.598521	0.590099	0.582517
55	0.726369	0.717411	0.707336	0.698263
60	0.858177	0.847607	0.835722	0.825018
65	1.00155	0.989225	0.975371	0.962892
70	1.15655	1.14233	1.12635	1.11195
75	1.32322	1.30696	1.28868	1.27222
80	1.50153	1.48309	1.46236	1.44369
85	1.69147	1.6707	1.64736	1.62633
90	1.89296	1.86972	1.84361	1.82007
95	2.10593	2.08008	2.05103	2.02486
100	2.33029	2.30168	2.26954	2.24058
120	3.33925	3.29826	3.25221	3.21071
140	4.52058	4.46507	4.40271	4.3465
160	5.86576	5.79369	5.71273	5.63975
180	7.36654	7.27598	7.17421	7.08248
200	9.01534	8.90441	8.77974	8.66737
220	10.8053	10.6722	10.5226	10.3878
240	12.7304	12.5734	12.397	12.2379
260	14.7852	14.6027	14.3974	14.2125
273.15	16.2045	16.0044	15.7792	15.5764
280	16.9649	16.7552	16.5194	16.3069
298.15	19.0475	18.8119	18.5468	18.308
300	19.2652	19.0269	18.7588	18.5172
350	25.5205	25.2039	24.8476	24.5265
400	32.4584	32.0548	31.6003	31.1907
450	40.0411	39.5421	38.9799	38.4734
500	48.2383	47.6359	46.9571	46.3456
550	57.0251	56.3118	55.5078	54.7835
600	66.381	65.5495	64.612	63.7674
650	76.2884	75.3316	74.2526	73.2806
700	86.7322	85.6432	84.4149	83.3086
750	97.699	96.4712	95.0861	93.8386
800	109.177	107.804	106.255	104.859
850	121.156	119.631	117.91	116.361
900	133.626	131.943	130.044	128.334
950	146.579	144.732	142.647	140.77
1000	160.006	157.989	155.713	153.663
1200	218.324	215.569	212.458	209.657
1400	283.737	280.155	276.109	272.466
1600	355.943	351.447	346.37	341.799
1800	434.696	429.205	423.003	417.42
2000	519.792	513.226	505.811	499.134
2500	759.202	749.615	738.789	729.041
3000	1035.08	1022.02	1007.27	993.984
3500	1345.82	1328.84	1309.68	1292.42
4000	1690.16	1668.85	1644.8	1623.14
4500	2067.08	2041.03	2011.64	1985.17
5000	2475.72	2444.55	2409.37	2377.68

## Sheet: Diff. Kr
Dij - Maxwell-Stefan diffusion coefficients of krypton isotopes at the standard pressure p= 101325 Pa
D0 - self-diffusion coefficient of krypton at the standard pressure p= 101325 Pa
T - Temperature
	D ×106 (m2/s)
T (K)	D12	D13	D14	D15	D16	D23	D24	D25	D26	D34	D35	D36	D45	D46	D56	D0
50	0.3214	0.319426	0.318472	0.317542	0.31573	0.317346	0.316384	0.31545	0.313624	0.314379	0.31344	0.311609	0.312469	0.310626	0.309673	0.311733
55	0.383332	0.380982	0.379846	0.378738	0.376581	0.378505	0.37736	0.376247	0.374073	0.374973	0.373855	0.371674	0.372698	0.370504	0.369369	0.371822
60	0.450734	0.447976	0.446642	0.445342	0.44281	0.445069	0.443724	0.442418	0.439866	0.440924	0.43961	0.43705	0.438252	0.435676	0.434344	0.437224
65	0.523699	0.5205	0.518952	0.517443	0.514506	0.517126	0.515567	0.514051	0.511091	0.512319	0.510794	0.507823	0.509218	0.50623	0.504685	0.508025
70	0.602309	0.598635	0.596858	0.595125	0.591751	0.594761	0.592969	0.591228	0.587828	0.58924	0.587488	0.584075	0.585677	0.582246	0.580471	0.584308
75	0.686638	0.682456	0.680432	0.678458	0.674617	0.678044	0.676004	0.674021	0.67015	0.671758	0.669764	0.665877	0.667701	0.663795	0.661773	0.666142
80	0.776748	0.772023	0.769735	0.767504	0.763164	0.767037	0.764732	0.76249	0.758117	0.759935	0.75768	0.753287	0.755349	0.750935	0.74865	0.753586
85	0.872688	0.867385	0.864816	0.862312	0.85744	0.861788	0.859201	0.856683	0.851774	0.853816	0.851284	0.846353	0.848667	0.843714	0.841148	0.846689
90	0.974496	0.968578	0.965712	0.962918	0.957482	0.962333	0.959446	0.956637	0.95116	0.953439	0.950613	0.94511	0.947693	0.942166	0.939303	0.945486
95	1.0822	1.07563	1.07245	1.06935	1.06331	1.0687	1.06549	1.06238	1.0563	1.05883	1.05569	1.04958	1.05245	1.04632	1.04314	1.05
100	1.1958	1.18855	1.18504	1.18161	1.17495	1.1809	1.17736	1.17392	1.1672	1.17	1.16653	1.15979	1.16295	1.15618	1.15267	1.16025
120	1.70931	1.69897	1.69395	1.68906	1.67955	1.68804	1.68299	1.67807	1.66849	1.67248	1.66753	1.6579	1.66242	1.65275	1.64774	1.65856
140	2.31652	2.3025	2.29571	2.28908	2.2762	2.2877	2.28086	2.27419	2.26122	2.26663	2.25992	2.24688	2.253	2.23991	2.23312	2.24777
160	3.01535	2.99712	2.98828	2.97965	2.96289	2.97785	2.96895	2.96027	2.94339	2.95043	2.9417	2.92473	2.9327	2.91566	2.90682	2.92589
180	3.8031	3.78011	3.76895	3.75807	3.73693	3.7558	3.74458	3.73363	3.71234	3.72123	3.71021	3.6888	3.69885	3.67736	3.66621	3.69026
200	4.67677	4.64848	4.63477	4.62138	4.59538	4.61859	4.60478	4.59132	4.56514	4.57606	4.56251	4.53617	4.54854	4.52211	4.5084	4.53797
220	5.63331	5.59923	5.5827	5.56657	5.53524	5.56321	5.54657	5.53034	5.4988	5.51196	5.49563	5.4639	5.47879	5.44695	5.43043	5.46607
240	6.66976	6.62939	6.60982	6.59072	6.5536	6.58673	6.56702	6.5478	6.51043	6.52602	6.50668	6.46909	6.48673	6.44901	6.42944	6.47166
260	7.78333	7.7362	7.71334	7.69104	7.6477	7.68638	7.66337	7.64092	7.59729	7.6155	7.59291	7.54902	7.56962	7.52558	7.50272	7.55201
273.15	8.55624	8.50442	8.47928	8.45475	8.4071	8.44962	8.42432	8.39963	8.35165	8.37167	8.34683	8.29856	8.32121	8.27278	8.24764	8.30185
280	8.97139	8.91703	8.89067	8.86495	8.81497	8.85957	8.83303	8.80714	8.75682	8.77782	8.75176	8.70113	8.7249	8.6741	8.64773	8.70459
298.15	10.112	10.0507	10.021	9.99195	9.93558	9.98588	9.95595	9.92675	9.87	9.89367	9.86428	9.80718	9.83398	9.77669	9.74695	9.81108
300	10.2315	10.1695	10.1394	10.1101	10.053	10.1039	10.0736	10.0441	9.98665	10.0106	9.98087	9.92308	9.9502	9.89223	9.86213	9.92703
350	13.683	13.5999	13.5596	13.5202	13.4438	13.512	13.4714	13.4318	13.3548	13.3869	13.3471	13.2696	13.306	13.2283	13.188	13.2749
400	17.5413	17.4345	17.3827	17.3322	17.234	17.3216	17.2694	17.2186	17.1197	17.1609	17.1097	17.0102	17.0569	16.9571	16.9052	17.017
450	21.7821	21.6492	21.5848	21.5219	21.3997	21.5086	21.4437	21.3804	21.2574	21.3087	21.2449	21.1211	21.1792	21.055	20.9905	21.1295
500	26.3855	26.2242	26.1459	26.0696	25.9213	26.0535	25.9747	25.8979	25.7486	25.8108	25.7334	25.5831	25.6536	25.5028	25.4244	25.5933
550	31.3351	31.1431	31.05	30.9592	30.7828	30.94	30.8463	30.7548	30.5771	30.6511	30.5591	30.3802	30.4641	30.2847	30.1914	30.3924
600	36.6171	36.3924	36.2835	36.1771	35.9706	36.1546	36.0449	35.9378	35.7298	35.8164	35.7086	35.4992	35.5974	35.3874	35.2782	35.5135
650	42.22	41.9606	41.8347	41.7119	41.4734	41.6859	41.5591	41.4355	41.1953	41.2953	41.1708	40.9289	41.0424	40.7997	40.6736	40.9453
700	48.1338	47.8376	47.6939	47.5537	47.2814	47.5239	47.3792	47.238	46.9638	47.0779	46.9358	46.6596	46.7891	46.5121	46.3681	46.6784
750	54.3498	54.0149	53.8524	53.6939	53.3861	53.6602	53.4966	53.337	53.0269	53.1559	52.9952	52.683	52.8294	52.5161	52.3533	52.7041
800	60.8604	60.4849	60.3027	60.1251	59.78	60.0872	59.9038	59.7248	59.3772	59.5217	59.3416	58.9915	59.1556	58.8044	58.6219	59.0152
850	67.6587	67.2408	67.0381	66.8404	66.4563	66.7982	66.5941	66.3949	66.0081	66.1689	65.9684	65.5788	65.7614	65.3706	65.1674	65.6052
900	74.7388	74.2767	74.0526	73.834	73.4093	73.7873	73.5616	73.3414	72.9136	73.0914	72.8697	72.4389	72.6409	72.2087	71.984	72.4681
950	82.0951	81.5871	81.3407	81.1004	80.6336	81.049	80.8009	80.5588	80.0886	80.284	80.0402	79.5667	79.7886	79.3135	79.0665	79.5987
1000	89.7227	89.1671	88.8976	88.6347	88.1242	88.5785	88.3071	88.0423	87.528	87.7417	87.4751	86.9571	87.1999	86.6802	86.41	86.9922
1200	122.861	122.098	121.728	121.367	120.667	121.29	120.917	120.554	119.848	120.141	119.775	119.064	119.397	118.684	118.313	119.112
1400	160.032	159.037	158.555	158.084	157.17	157.983	157.497	157.023	156.102	156.484	156.007	155.079	155.514	154.583	154.099	155.142
1600	201.053	199.802	199.196	198.604	197.454	198.476	197.865	197.269	196.111	196.592	195.991	194.825	195.371	194.201	193.592	194.904
1800	245.779	244.249	243.507	242.783	241.377	242.627	241.879	241.15	239.733	240.321	239.587	238.16	238.829	237.397	236.652	238.256
2000	294.089	292.257	291.368	290.502	288.819	290.315	289.42	288.547	286.852	287.555	286.676	284.968	285.769	284.055	283.164	285.084
2500	429.909	427.23	425.931	424.664	422.203	424.391	423.082	421.806	419.326	420.355	419.069	416.572	417.742	415.236	413.933	416.74
3000	586.273	582.62	580.849	579.121	575.765	578.748	576.964	575.223	571.843	573.245	571.492	568.087	569.683	566.266	564.488	568.317
3500	762.247	757.499	755.197	752.951	748.59	752.468	750.148	747.886	743.492	745.315	743.037	738.611	740.685	736.244	733.934	738.909
4000	957.103	951.144	948.255	945.436	939.962	944.829	941.918	939.079	933.564	935.853	932.993	927.438	930.041	924.467	921.568	927.813
4500	1170.25	1162.97	1159.44	1155.99	1149.3	1155.25	1151.69	1148.22	1141.48	1144.28	1140.78	1134	1137.18	1130.37	1126.82	1134.45
5000	1401.19	1392.48	1388.25	1384.13	1376.12	1383.24	1378.99	1374.83	1366.77	1370.11	1365.93	1357.81	1361.62	1353.46	1349.22	1358.36

## Sheet: Diff. Xe
Dij - Maxwell-Stefan diffusion coefficients of krypton isotopes at the standard pressure p= 101325 Pa
D0 - self-diffusion coefficient of krypton at the standard pressure p= 101325 Pa
T - Temperature
	D ×106 (m2/s)
T (K)	D12	D13	D14	D15	D16	D17	D23	D24	D25	D26	D27	D34	D35	D36	D37	D45	D46	D47	D56	D57	D67	D0
70	0.353927	0.353239	0.352563	0.351892	0.35058	0.349297	0.35254	0.351859	0.351189	0.349871	0.348588	0.351169	0.350494	0.349176	0.34789	0.349809	0.348487	0.347199	0.347811	0.346519	0.345184	0.350014
75	0.401973	0.401193	0.400425	0.399664	0.398176	0.396721	0.400399	0.399626	0.398867	0.397371	0.395916	0.398844	0.398078	0.396583	0.395124	0.397302	0.395801	0.39434	0.395034	0.393569	0.392054	0.397556
80	0.453065	0.452187	0.451322	0.450465	0.44879	0.447152	0.451293	0.450423	0.449568	0.447884	0.446246	0.449542	0.44868	0.446996	0.445354	0.447806	0.446117	0.444472	0.445253	0.443604	0.441898	0.44811
85	0.507239	0.506257	0.50529	0.504331	0.502457	0.500626	0.505257	0.504284	0.503328	0.501445	0.499612	0.503299	0.502335	0.500452	0.498615	0.501357	0.499468	0.497629	0.498502	0.496658	0.49475	0.501712
90	0.564531	0.563439	0.562363	0.561297	0.559214	0.557178	0.562327	0.561245	0.560181	0.558088	0.556051	0.560149	0.559078	0.556984	0.554942	0.557991	0.555891	0.553845	0.554816	0.552766	0.550646	0.558397
95	0.624972	0.623765	0.622574	0.621396	0.619091	0.616839	0.622535	0.621338	0.620162	0.617846	0.615593	0.620126	0.618942	0.616626	0.614367	0.617739	0.615416	0.613154	0.614228	0.61196	0.609615	0.618196
100	0.688594	0.687265	0.685954	0.684657	0.682119	0.679641	0.685911	0.684593	0.683298	0.680749	0.678269	0.683259	0.681955	0.679406	0.676919	0.680631	0.678074	0.675584	0.676766	0.67427	0.671688	0.681139
120	0.975368	0.973491	0.971637	0.969806	0.96622	0.96272	0.971577	0.969716	0.967886	0.964286	0.960783	0.96783	0.96599	0.962388	0.958876	0.964119	0.960508	0.956989	0.95866	0.955134	0.951488	0.964829
140	1.31457	1.31204	1.30955	1.30708	1.30226	1.29755	1.30947	1.30696	1.3045	1.29966	1.29494	1.30442	1.30195	1.2971	1.29238	1.29943	1.29457	1.28984	1.29209	1.28734	1.28244	1.30034
160	1.70658	1.70331	1.70007	1.69688	1.69062	1.68451	1.69997	1.69672	1.69352	1.68724	1.68113	1.69343	1.69022	1.68393	1.6778	1.68695	1.68065	1.67451	1.67742	1.67127	1.66491	1.68805
180	2.15119	2.14706	2.14299	2.13896	2.13107	2.12338	2.14286	2.13876	2.13474	2.12683	2.11912	2.13462	2.13058	2.12265	2.11493	2.12646	2.11852	2.11079	2.11446	2.10671	2.09869	2.12775
200	2.64775	2.64267	2.63765	2.6327	2.62299	2.61353	2.63749	2.63246	2.62751	2.61777	2.60829	2.62735	2.62238	2.61263	2.60313	2.61732	2.60755	2.59803	2.60255	2.59301	2.58315	2.61881
220	3.19534	3.18921	3.18315	3.17718	3.16546	3.15404	3.18296	3.17688	3.17091	3.15916	3.14772	3.17072	3.16473	3.15296	3.1415	3.15862	3.14683	3.13534	3.14079	3.12928	3.11739	3.1603
240	3.79286	3.78559	3.7784	3.77131	3.7574	3.74385	3.77817	3.77096	3.76386	3.74992	3.73634	3.76364	3.75653	3.74256	3.72896	3.74928	3.73528	3.72165	3.72812	3.71446	3.70033	3.75117
260	4.43916	4.43064	4.42222	4.41393	4.39765	4.38178	4.42196	4.41352	4.40521	4.38889	4.373	4.40495	4.39662	4.38028	4.36435	4.38814	4.37176	4.3558	4.36337	4.34738	4.33085	4.39025
273.15	4.89008	4.8807	4.87143	4.86229	4.84435	4.82687	4.87114	4.86184	4.85268	4.8347	4.81719	4.8524	4.84323	4.82522	4.80767	4.83387	4.81583	4.79825	4.80659	4.78897	4.77076	4.83614
280	5.13301	5.12316	5.11342	5.10383	5.085	5.06665	5.11312	5.10335	5.09375	5.07487	5.05649	5.09345	5.08382	5.06491	5.04649	5.074	5.05506	5.0366	5.04536	5.02686	5.00774	5.07635
298.15	5.80283	5.79169	5.78068	5.76983	5.74854	5.72779	5.78033	5.76929	5.75843	5.73709	5.7163	5.7581	5.7472	5.72583	5.705	5.7361	5.71468	5.69381	5.70371	5.6828	5.66118	5.73868
300	5.87321	5.86194	5.85079	5.83981	5.81826	5.79726	5.85044	5.83927	5.82827	5.80667	5.78563	5.82793	5.81691	5.79527	5.77419	5.80567	5.78399	5.76287	5.77289	5.75173	5.72984	5.80827
350	7.91883	7.90362	7.88858	7.87376	7.84468	7.81634	7.88811	7.87303	7.85819	7.82904	7.80065	7.85773	7.84286	7.81366	7.7852	7.82769	7.79843	7.76992	7.78345	7.75488	7.72535	7.83098
400	10.2296	10.21	10.1905	10.1713	10.1337	10.0971	10.1899	10.1704	10.1512	10.1135	10.0768	10.1506	10.1314	10.0936	10.0568	10.1118	10.0739	10.037	10.0545	10.0176	9.97938	10.1158
450	12.7905	12.7658	12.7415	12.7175	12.6704	12.6245	12.7407	12.7163	12.6922	12.645	12.5991	12.6915	12.6674	12.6201	12.574	12.6429	12.5955	12.5493	12.5712	12.5249	12.4771	12.6479
500	15.5882	15.5582	15.5284	15.4991	15.4416	15.3856	15.5275	15.4977	15.4683	15.4107	15.3546	15.4674	15.438	15.3803	15.324	15.408	15.3502	15.2938	15.3206	15.2641	15.2057	15.4141
550	18.6117	18.5757	18.5401	18.5051	18.4364	18.3694	18.539	18.5034	18.4683	18.3994	18.3323	18.4672	18.432	18.363	18.2957	18.3962	18.327	18.2596	18.2916	18.224	18.1542	18.4034
600	21.8512	21.8089	21.7671	21.7259	21.645	21.5662	21.7657	21.7238	21.6826	21.6015	21.5226	21.6813	21.6399	21.5587	21.4796	21.5977	21.5164	21.4371	21.4747	21.3953	21.3131	21.6062
650	25.2984	25.2494	25.2009	25.1531	25.0594	24.968	25.1993	25.1507	25.1029	25.0089	24.9174	25.1014	25.0534	24.9593	24.8676	25.0045	24.9102	24.8183	24.8619	24.7698	24.6745	25.0143
700	28.9462	28.89	28.8344	28.7797	28.6722	28.5676	28.8327	28.7769	28.7221	28.6144	28.5095	28.7204	28.6655	28.5576	28.4525	28.6094	28.5013	28.396	28.4459	28.3404	28.2312	28.6207
750	32.7882	32.7245	32.6614	32.5993	32.4774	32.3587	32.6594	32.5962	32.534	32.4119	32.2929	32.5321	32.4697	32.3473	32.2281	32.4061	32.2835	32.164	32.2207	32.1009	31.9771	32.419
800	36.8189	36.7472	36.6763	36.6065	36.4695	36.3359	36.6741	36.603	36.5331	36.3957	36.2619	36.5309	36.4608	36.3231	36.1891	36.3893	36.2514	36.117	36.1807	36.0461	35.9068	36.4038
850	41.0334	40.9534	40.8743	40.7964	40.6434	40.4944	40.8718	40.7924	40.7144	40.5611	40.4118	40.7119	40.6337	40.4801	40.3305	40.5539	40.4	40.2501	40.3212	40.1709	40.0155	40.5702
900	45.4273	45.3386	45.2509	45.1645	44.995	44.8299	45.2481	45.1602	45.0737	44.9038	44.7383	45.071	44.9843	44.814	44.6482	44.8958	44.7252	44.559	44.6378	44.4713	44.299	44.9139
950	49.9966	49.8989	49.8022	49.7071	49.5203	49.3384	49.7992	49.7023	49.607	49.4198	49.2375	49.604	49.5085	49.3209	49.1382	49.411	49.223	49.0399	49.1267	48.9432	48.7534	49.4311
1000	54.7378	54.6307	54.5248	54.4205	54.2159	54.0164	54.5214	54.4153	54.3108	54.1057	53.9058	54.3075	54.2028	53.9973	53.797	54.096	53.89	53.6893	53.7844	53.5833	53.3752	54.1181
1200	75.361	75.2131	75.0667	74.9227	74.6399	74.3645	75.0621	74.9154	74.7711	74.4877	74.2116	74.7665	74.6219	74.3379	74.0612	74.4743	74.1897	73.9124	74.0438	73.766	73.4785	74.5054
1400	98.5185	98.3246	98.1328	97.944	97.5735	97.2125	98.1267	97.9345	97.7453	97.3739	97.0121	97.7393	97.5498	97.1776	96.815	97.3563	96.9833	96.62	96.7922	96.428	96.0511	97.3977
1600	124.084	123.84	123.598	123.359	122.892	122.436	123.59	123.347	123.109	122.64	122.184	123.101	122.862	122.392	121.935	122.618	122.147	121.689	121.906	121.446	120.971	122.671
1800	151.96	151.66	151.363	151.071	150.497	149.939	151.353	151.056	150.763	150.189	149.629	150.754	150.461	149.885	149.324	150.161	149.584	149.022	149.288	148.725	148.142	150.227
2000	182.065	181.705	181.349	180.999	180.311	179.641	181.338	180.981	180.63	179.941	179.27	180.619	180.267	179.576	178.904	179.908	179.216	178.542	178.861	178.185	177.486	179.987
2500	266.667	266.14	265.618	265.104	264.096	263.113	265.601	265.078	264.563	263.552	262.568	264.547	264.031	263.018	262.031	263.504	262.489	261.5	261.969	260.978	259.952	263.622
3000	363.996	363.275	362.562	361.861	360.484	359.142	362.539	361.825	361.122	359.742	358.397	361.1	360.395	359.011	357.664	359.676	358.289	356.939	357.579	356.225	354.824	359.838
3500	473.451	472.514	471.586	470.674	468.882	467.137	471.556	470.627	469.712	467.917	466.168	469.683	468.767	466.967	465.214	467.831	466.028	464.271	465.103	463.343	461.52	468.044
4000	594.568	593.391	592.226	591.08	588.831	586.64	592.189	591.022	589.874	587.619	585.423	589.837	588.686	586.427	584.226	587.511	585.247	583.041	584.086	581.875	579.587	587.78
4500	726.971	725.532	724.108	722.708	719.958	717.28	724.063	722.636	721.232	718.477	715.792	721.188	719.781	717.019	714.329	718.345	715.577	712.881	714.158	711.456	708.658	718.675
5000	870.347	868.625	866.921	865.245	861.954	858.748	866.867	865.159	863.479	860.181	856.968	863.426	861.742	858.436	855.216	860.024	856.711	853.484	855.012	851.778	848.43	860.419

## Sheet: Ther.diff. Ne
α0i - Isotopic thermal diffusion factor of neon
α0 - thermal self-diffusion factor of neon
T - Temperature
T (K)	α01	α02	α03	α0
20	0.060534	0.059674	0.060576	0.058523
25	0.015694	0.014371	0.015719	0.01367
30	0.009077	0.00791	0.009097	0.007366
35	0.022867	0.022056	0.022889	0.021455
40	0.046886	0.046468	0.046915	0.045683
45	0.075481	0.075435	0.075519	0.074393
50	0.105526	0.105811	0.105574	0.10448
55	0.135309	0.135884	0.135368	0.134253
60	0.163921	0.164747	0.163991	0.162817
65	0.19091	0.191953	0.19099	0.189736
70	0.216087	0.217319	0.216177	0.214829
75	0.239414	0.240813	0.239514	0.238066
80	0.260938	0.262483	0.261047	0.259497
85	0.280751	0.282424	0.280868	0.279217
90	0.298965	0.300752	0.299089	0.29734
95	0.3157	0.317591	0.315831	0.313989
100	0.331078	0.333061	0.331216	0.329286
120	0.381224	0.383501	0.381383	0.379154
140	0.417536	0.420021	0.41771	0.415261
160	0.444288	0.446929	0.444473	0.441865
180	0.464329	0.46709	0.464522	0.461799
200	0.479565	0.48242	0.479764	0.476959
220	0.491292	0.494223	0.491496	0.488632
240	0.50041	0.503402	0.500618	0.497711
260	0.507554	0.510597	0.507765	0.504828
273.15	0.511403	0.514474	0.511615	0.508664
280	0.513183	0.516268	0.513396	0.510439
298.15	0.517264	0.520381	0.517479	0.514509
300	0.517633	0.520754	0.517848	0.514877
350	0.525102	0.528288	0.52532	0.522336
400	0.529161	0.532391	0.52938	0.5264
450	0.531168	0.534427	0.531387	0.52842
500	0.53189	0.53517	0.532109	0.52916
550	0.531785	0.535079	0.532005	0.529076
600	0.531138	0.534442	0.531357	0.528451
650	0.530131	0.53344	0.530349	0.527465
700	0.528883	0.532196	0.529101	0.526238
750	0.527476	0.53079	0.527693	0.524852
800	0.525965	0.52928	0.526181	0.523362
850	0.524389	0.527703	0.524605	0.521806
900	0.522776	0.526089	0.522991	0.520213
950	0.521145	0.524456	0.521359	0.5186
1000	0.51951	0.522818	0.519723	0.516983
1200	0.51309	0.516383	0.5133	0.51063
1400	0.507037	0.510313	0.507244	0.504635
1600	0.501414	0.504673	0.501619	0.499065
1800	0.496207	0.499448	0.49641	0.493904
2000	0.491376	0.494601	0.491577	0.489115
2500	0.480681	0.483866	0.480877	0.47851
3000	0.471539	0.474687	0.47173	0.469443
3500	0.463561	0.466676	0.463749	0.461528
4000	0.456481	0.459567	0.456666	0.454504
4500	0.450113	0.453171	0.450296	0.448185
5000	0.444323	0.447355	0.444503	0.442438

## Sheet: Ther.diff. Ar
α0i - Isotopic thermal diffusion factor of argon
α0 - thermal self-diffusion factor of argon
T - Temperature
T (K)	α01	α02	α03	α0
30	0.309972	0.311148	0.310687	0.312711
35	0.282817	0.283749	0.283458	0.285018
40	0.251262	0.251978	0.251821	0.252976
45	0.218409	0.218951	0.218889	0.219723
50	0.186618	0.187027	0.187024	0.187622
55	0.157403	0.157712	0.157742	0.158173
60	0.131579	0.131817	0.13186	0.132177
65	0.109465	0.109653	0.109698	0.10994
70	0.091061	0.091215	0.091255	0.091448
75	0.076177	0.076308	0.076339	0.076504
80	0.064522	0.064639	0.06466	0.064809
85	0.055765	0.055875	0.055885	0.056029
90	0.049566	0.049675	0.049674	0.04982
95	0.0456	0.045713	0.0457	0.045856
100	0.043566	0.043687	0.043662	0.043832
120	0.049716	0.049905	0.04983	0.050107
140	0.06988	0.070182	0.070044	0.070488
160	0.096497	0.096941	0.096726	0.097382
180	0.125406	0.126007	0.125706	0.126597
200	0.15437	0.155132	0.154741	0.155876
220	0.182226	0.183147	0.182666	0.184043
240	0.208413	0.209484	0.208917	0.210525
260	0.232702	0.233915	0.233266	0.23509
273.15	0.247612	0.248912	0.248214	0.250171
280	0.25505	0.256393	0.25567	0.257694
298.15	0.273698	0.27515	0.274364	0.276554
300	0.275515	0.276977	0.276185	0.278392
350	0.319194	0.320907	0.319973	0.322562
400	0.353859	0.355763	0.354722	0.357602
450	0.381449	0.383498	0.38238	0.385477
500	0.403544	0.405702	0.404528	0.407787
550	0.421362	0.423601	0.422388	0.425766
600	0.43583	0.438131	0.43689	0.440356
650	0.447654	0.45	0.448741	0.45227
700	0.457369	0.459749	0.458479	0.462053
750	0.465391	0.467794	0.466518	0.470123
800	0.472038	0.474459	0.473181	0.476806
850	0.477564	0.479996	0.478718	0.482355
900	0.482165	0.484604	0.483329	0.486971
950	0.486	0.488442	0.487171	0.490815
1000	0.489195	0.491638	0.490373	0.494013
1200	0.497373	0.499803	0.498566	0.502169
1400	0.500906	0.503307	0.502104	0.50565
1600	0.501869	0.504237	0.503066	0.506551
1800	0.501344	0.503676	0.502537	0.505958
2000	0.499929	0.502226	0.501117	0.504477
2500	0.494476	0.49669	0.495645	0.498865
3000	0.487999	0.490139	0.48915	0.492247
3500	0.481383	0.483457	0.482515	0.485504
4000	0.474938	0.476953	0.476052	0.478945
4500	0.468769	0.470731	0.469866	0.472674
5000	0.462903	0.464816	0.463984	0.466714

## Sheet: Ther.diff. Kr
α0i - Isotopic thermal diffusion factor of krypton
α0 - thermal self-diffusion factor of krypton
T - Temperature
T (K)	α01	α02	α03	α04	α05	α06	α0
50	0.277222	0.277585	0.277569	0.275997	0.301585	0.279739	0.278589
55	0.254669	0.25497	0.254917	0.253443	0.277166	0.256881	0.255868
60	0.231411	0.231657	0.231577	0.230212	0.251953	0.233335	0.232453
65	0.208324	0.208522	0.208423	0.207174	0.226898	0.209986	0.209223
70	0.186075	0.186234	0.186124	0.184991	0.20273	0.187503	0.186846
75	0.165135	0.165261	0.165148	0.164129	0.179965	0.166358	0.165795
80	0.145807	0.145909	0.145795	0.144886	0.15894	0.146855	0.146372
85	0.128264	0.128345	0.128236	0.127429	0.139845	0.129161	0.128748
90	0.112575	0.112641	0.112539	0.111824	0.122761	0.113345	0.112991
95	0.09874	0.098794	0.0987	0.098069	0.107688	0.099403	0.0991
100	0.086708	0.086753	0.086667	0.086111	0.094574	0.087282	0.087022
120	0.05467	0.0547	0.054646	0.054295	0.059624	0.055035	0.054879
140	0.042889	0.042925	0.042896	0.042631	0.046729	0.043213	0.04309
160	0.044704	0.044759	0.044749	0.044488	0.048635	0.045097	0.044962
180	0.055137	0.055221	0.055228	0.054922	0.059915	0.055674	0.0555
200	0.070768	0.070889	0.070915	0.070535	0.076843	0.071502	0.07127
220	0.089327	0.089491	0.089536	0.089068	0.096948	0.090289	0.08999
240	0.109326	0.109536	0.109603	0.109039	0.118611	0.110534	0.110163
260	0.129802	0.13006	0.13015	0.129489	0.140788	0.131265	0.130819
273.15	0.143217	0.143507	0.143612	0.142888	0.155316	0.144848	0.144354
280	0.150139	0.150446	0.150559	0.149803	0.162811	0.151857	0.151338
298.15	0.168149	0.168499	0.168634	0.167794	0.182313	0.170095	0.169509
300	0.169953	0.170307	0.170444	0.169595	0.184266	0.171922	0.171329
350	0.215915	0.216382	0.216576	0.215514	0.234027	0.218471	0.217709
400	0.255952	0.256519	0.256762	0.255514	0.277372	0.259021	0.258111
450	0.290192	0.290842	0.291127	0.28972	0.314445	0.293696	0.29266
500	0.319276	0.319996	0.320314	0.318769	0.345943	0.323145	0.322002
550	0.343947	0.344724	0.345068	0.343404	0.37267	0.348118	0.346886
600	0.364902	0.365725	0.366089	0.364323	0.395379	0.369324	0.368017
650	0.382748	0.383608	0.383986	0.382132	0.414727	0.387377	0.386007
700	0.397995	0.398885	0.399273	0.397342	0.431263	0.402796	0.401372
750	0.411065	0.411979	0.412375	0.410375	0.445445	0.416008	0.41454
800	0.422307	0.42324	0.423641	0.421581	0.457649	0.427368	0.425863
850	0.432008	0.432956	0.433359	0.431247	0.468184	0.437166	0.435629
900	0.440403	0.441363	0.441767	0.439608	0.477306	0.445642	0.444078
950	0.447687	0.448657	0.44906	0.44686	0.485226	0.452993	0.451406
1000	0.454023	0.455	0.455401	0.453165	0.492117	0.459384	0.457778
1200	0.472262	0.473252	0.473641	0.471293	0.511982	0.477759	0.476102
1400	0.482943	0.483932	0.484305	0.481884	0.523647	0.488495	0.486811
1600	0.489138	0.49012	0.490475	0.488005	0.53044	0.494699	0.493005
1800	0.492547	0.493518	0.493856	0.491354	0.534203	0.498093	0.496396
2000	0.494163	0.495121	0.495444	0.49292	0.536013	0.49968	0.497985
2500	0.493815	0.49474	0.495027	0.492478	0.535753	0.499231	0.497554
3000	0.490425	0.49132	0.491578	0.489025	0.532167	0.49573	0.494078
3500	0.485827	0.486693	0.486928	0.484381	0.527251	0.491022	0.489395
4000	0.480782	0.481622	0.481836	0.479303	0.521837	0.485873	0.484271
4500	0.475634	0.47645	0.476647	0.474128	0.516301	0.480627	0.479049
5000	0.470541	0.471337	0.471518	0.469015	0.510819	0.475444	0.473889

## Sheet: Ther.diff. Xe
α0i - Isotopic thermal diffusion factor of xenon
α0 - thermal self-diffusion factor of xenon
T - Temperature
T (K)	α01	α02	α03	α04	α05	α06	α07	α0
70	0.28162	0.282066	0.280053	0.272385	0.290261	0.284914	0.284267	0.281753
75	0.265717	0.266128	0.264213	0.256914	0.273899	0.268805	0.268179	0.266014
80	0.24932	0.249696	0.247885	0.240979	0.257022	0.252198	0.251597	0.249761
85	0.23277	0.233113	0.231409	0.224912	0.239983	0.235441	0.234867	0.233336
90	0.21636	0.216673	0.215078	0.208994	0.223084	0.218829	0.218285	0.217031
95	0.20033	0.200613	0.199127	0.193457	0.206572	0.202604	0.202091	0.201088
100	0.184866	0.185123	0.183743	0.17848	0.190641	0.186955	0.186473	0.185695
120	0.130954	0.131126	0.130131	0.126335	0.135075	0.132413	0.132055	0.131935
140	0.09166	0.091777	0.091074	0.088392	0.094554	0.092673	0.092417	0.092661
160	0.066141	0.066225	0.065718	0.063782	0.068228	0.066872	0.066688	0.067105
180	0.051941	0.052011	0.051616	0.05011	0.053573	0.052521	0.052381	0.052854
200	0.04646	0.046527	0.04618	0.044858	0.047906	0.046987	0.046869	0.047327
220	0.047449	0.047522	0.047176	0.045856	0.04891	0.047997	0.047885	0.048285
240	0.053116	0.053204	0.052824	0.051375	0.054738	0.05374	0.053623	0.053939
260	0.062088	0.062195	0.061757	0.060091	0.06397	0.062826	0.062696	0.062915
273.15	0.069276	0.069398	0.068914	0.067069	0.071369	0.070105	0.069964	0.070115
280	0.07333	0.073459	0.072949	0.071003	0.075541	0.074209	0.074062	0.074176
298.15	0.084845	0.084998	0.084412	0.082179	0.087394	0.085868	0.085703	0.085719
300	0.08607	0.086226	0.085631	0.083368	0.088655	0.087109	0.086942	0.086947
350	0.121097	0.121324	0.1205	0.117362	0.12471	0.122574	0.122352	0.122091
400	0.156827	0.157127	0.15607	0.152046	0.161486	0.158753	0.158476	0.157969
450	0.1908	0.191172	0.189894	0.185032	0.196453	0.193154	0.192827	0.192101
500	0.222031	0.222468	0.220988	0.215357	0.228595	0.224779	0.224406	0.22349
550	0.250243	0.250739	0.249076	0.24275	0.257631	0.253347	0.252932	0.251852
600	0.275492	0.27604	0.274214	0.267264	0.283618	0.278914	0.278461	0.277241
650	0.297984	0.298579	0.296606	0.289098	0.306768	0.301689	0.301201	0.299861
700	0.317978	0.318613	0.316509	0.308503	0.327348	0.321932	0.321414	0.319971
750	0.335741	0.336412	0.334192	0.32574	0.345634	0.339918	0.339371	0.337839
800	0.351532	0.352234	0.349908	0.341057	0.36189	0.355904	0.355331	0.353724
850	0.365581	0.366311	0.363892	0.354683	0.376356	0.370127	0.36953	0.367858
900	0.3781	0.378854	0.37635	0.36682	0.389247	0.3828	0.38218	0.380453
950	0.389272	0.390046	0.387466	0.377647	0.400752	0.394108	0.393467	0.391692
1000	0.399257	0.40005	0.397401	0.387322	0.411036	0.404214	0.403555	0.401738
1200	0.429889	0.430735	0.427872	0.416975	0.442594	0.435212	0.434489	0.432557
1400	0.450016	0.450893	0.447883	0.436428	0.463339	0.455572	0.454802	0.452804
1600	0.463461	0.464357	0.461245	0.449401	0.477206	0.469168	0.468362	0.466329
1800	0.472513	0.473418	0.470235	0.458116	0.486548	0.478317	0.477482	0.475432
2000	0.478586	0.479496	0.476262	0.463947	0.492822	0.484452	0.483595	0.481538
2500	0.485965	0.486874	0.483568	0.470979	0.500462	0.491893	0.490998	0.48895
3000	0.487369	0.488269	0.484936	0.472244	0.501941	0.493292	0.492376	0.490352
3500	0.485938	0.486825	0.483488	0.470779	0.500494	0.491825	0.490896	0.488901
4000	0.48309	0.483965	0.480635	0.467955	0.497583	0.488928	0.487992	0.486026
4500	0.479527	0.480388	0.477073	0.464448	0.493932	0.485309	0.484368	0.482433
5000	0.475616	0.476464	0.473168	0.460612	0.48992	0.48134	0.480397	0.47849
